# Supplementary material for: Effects of Beta-Alanine Supplementation on Brain Homocarnosine/Carnosine Signal and Cognitive Function: An Exploratory Study
Source: PLoS One. 2015 Apr 14;10(4):e0123857. doi: 10.1371/journal.pone.0123857 (PMC4397072; doi:10.1371/journal.pone.0123857)
Supplement: S1 Data — (XLSX) [file pone.0123857.s002.xlsx]

## Sheet: Demographic data
	Demographic data
	vegetarians
	gender (F/M)	age (y)	weight (Kg)	height (m)	BMI (Kg/m²)	diet		schooling (y)
	M	26	74	1.74	24.4418	lacto-ovo-vegetarians		15
	M	28	72	1.73	24.0569	vegan		15
	F	34	75	1.63	28.2284	lacto-ovo-vegetarians		15
	M	28	69	1.68	24.4473	lacto-ovo-vegetarians		17
	M	21	85	1.79	26.5285	lacto-ovo-vegetarians		15
	F	27	54.5	1.62	20.7667	lacto-ovo-vegetarians		21
		27.3333	71.5833	1.69833	24.7449			16.3333
		4.17931	9.96201	0.0667583	2.52175			2.42212
	omnivores
	gender (F/M)	age (y)	weight (Kg)	height (m)	BMI (Kg/m²)	diet		schooling (y)
	M	25	98	1.89	27.4348	omnivorous		19
	F	26	84	1.78	26.5118	omnivorous		17
	M	41	61	1.65	22.4059	omnivorous		26
	M	52	62	1.7	21.4533	omnivorous		15
	F	37	58	1.67	20.7967	omnivorous		19
	M	23	75	1.73	25.0593	omnivorous		10
	F	21	52	1.57	21.0962	omnivorous		12
		32.1429	70	1.71286	23.5369			16.8571
		11.4953	16.4215	0.102097	2.75221			5.27347

## Sheet: MRS data
	Data from MRS (Cs/Cr ratio pick)
	vegetarians
	Cs/Cr ratio baseline		Cs/Cr ratio post
	0.110904		0.0806391
	0.110188		0.117672
	0.096819		0.136682
	0.0736557		0.136554
	0.111446		0.0661146
	0.0973526		0.0871669
	0.096769		0.0921589
	0.0995907		0.102427
	0.0133799		0.0279943
	omnivores
	Cs/Cr ratio baseline		Cs/Cr ratio post
	0.0954222		0.110627
	0.0886671		0.109405
	0.128663		0.138168
	0.114097		0.139809
	0.0990995		0.124039
	0.0849814		0.112041
	0.139241		0.153066
	0.107167		0.126737
	0.0207217		0.0172141

## Sheet: Dietary Beta-alanine
	Dietary beta -alanine
	vegetarians
	Day 1	Day 2	Day 3	SD
	0	0	0	0
	0	0	0	0
	0	0	0	0
	0	0	0	0
	0	0	0	0
	0	0	0	0
	0	0	0	0
				0
	omnivores
	Day 1	Day 2	Day 3	SD
	1029.4	291.6	1096.3	805.767
	649.8	299.9	224.5	391.4
	87.4	356.6	436.7	293.567
	438.2	833.8	583.2	618.4
	439.9	307.3	420.9	389.367
	445.2	718.2	772.1	645.167
	348.9	379.9	140	289.6
				490.467
				199.527
